# Supplementary material for: Shotgun-Based Mass Spectrometry Analysis of Phospholipid and Triacylglycerol Molecular Species and Eicosanoids in Salmon Muscle Tissue on Feeding Microbial Oil
Source: MDPI journal article supplement (doi:10.3390/md22010011), 2023-12-21
Supplement: s1 [file s1]

**Table S1. Changes in the level of phospholipid species in salmon muscle tissue upon feeding four different diets**

| <b>[M + Na]<sup>+</sup></b> | <b>C: double bond ratio</b> | <b>PC</b>                     | <b>High MO (%)</b> | <b>Low MO (%)</b> | <b>FO (%)</b> | <b>FO/VO (%)</b> |
|-----------------------------|-----------------------------|-------------------------------|--------------------|-------------------|---------------|------------------|
| 782.4                       | 34:1                        | 16:0_18:1-PC                  | 1.3 ± 0.3b         | 2.0 ± 0.8a        | 1.1 ± 0.3b    | 2.1 ± 0.5a       |
| 802.4                       | 36:5                        | 16:0_20:5-PC/<br>18:2_18:3-PC | 1.4 ± 0.4c         | 1.8 ± 0.8c        | 14.4 ± 0.8a   | 12.2 ± 2.0b      |
| 804.5                       | 36:4                        | 16:0_20:4-PC                  | 0.1 ± 0.3c         | 0.7 ± 0.9b        | 1.1 ± 0.1ab   | 1.4 ± 0.4a       |
| 828.4                       | 38:6                        | 16:0_22:6-PC                  | 72.3 ± 3.7a        | 62.2 ± 4.6bc      | 64.4 ± 1.8b   | 59.5 ± 2.6c      |
| 850.4                       | 40:9                        | 18:3_22:6-PC                  | 2.1 ± 0.6c         | 4.2 ± 0.7a        | 0.9 ± 0.3d    | 3.0 ± 0.2b       |
| 852.4                       | 40:8                        | 18:2_22:6-PC/<br>20:3_20:5-PC | 4.8 ± 1.0b         | 7.0 ± 1.0a        | 1.8 ± 0.4d    | 3.8 ± 0.4c       |
| 854.4                       | 40:7                        | 18:1_22:6-PC                  | 17.6 ± 1.7b        | 21.9 ± 1.2a       | 6.8 ± 1.8d    | 12.0 ± 1.1c      |
| 874.4                       | 42:11                       | 20:5_22:6-PC                  | 0.3 ± 0.3c         | 0.1 ± 0.4c        | 9.5 ± 0.8a    | 5.9 ± 0.4b       |
| <b>[M - H]<sup>-</sup></b>  |                             | <b>PE</b>                     | <b>High MO (%)</b> | <b>Low MO (%)</b> | <b>FO (%)</b> | <b>FO/VO (%)</b> |
| 736.5                       | 36:5                        | 16:0_20:5-PE                  | 0.1 ± 0.1b         | 0.3 ± 0.1a        | 0.1 ± 0.0b    | 0.0 ± 0.0c       |
| 758.5                       | 38:8                        | 18:3_20:5-PE                  | 0.2 ± 0.1b         | 0.3 ± 0.1ab       | 0.3 ± 0.2ab   | 0.4 ± 0.2a       |
| 760.5                       | 38:7                        | 18:2_20:5-PE                  | 0.8 ± 0.4b         | 0.9 ± 0.6b        | 2.7 ± 1.1a    | 2.1 ± 1.0a       |
| 762.5                       | 38:6                        | 16:0_22:6-PE/<br>18:1_20:5-PE | 28.4 ± 7.0ab       | 22.8 ± 5.8b       | 30.8 ± 4.8a   | 28.4 ± 2.4ab     |
| 764.5                       | 38:5                        | 16:0_22:5-PE/<br>18:0_20:5-PE | 4.4 ± 1.4a         | 4.4 ± 1.8a        | 5.4 ± 1.4a    | 5.0 ± 1.6a       |
| 786.5                       | 40:8                        | 18:2_22:6-PE                  | 11.0 ± 3.5a        | 13.0 ± 4.6a       | 6.9 ± 2.1b    | 11.5 ± 2.7a      |
| 788.5                       | 40:7                        | 18:2_22:5-PE                  | 23.0 ± 4.4a        | 22.6 ± 7.4a       | 15.0 ± 3.2b   | 20.6 ± 5.0ab     |
| 790.5                       | 40:6                        | 18:0_22:6-PE                  | 8.2 ± 2.3a         | 10.9 ± 4.3a       | 11.1 ± 2.2a   | 11.2 ± 2.0a      |
| 808.5                       | 42:11                       | 20:5_22:6-PE                  | 0.6 ± 0.2c         | 1.5 ± 0.7c        | 10.2 ± 2.9a   | 7.0 ± 1.6b       |
| 812.5                       | 42:9                        | 20:3_22:6-PE                  | 0.6 ± 0.3b         | 2.0 ± 1.2a        | 1.5 ± 0.6a    | 1.8 ± 0.4a       |
| 814.5                       | 42:8                        | 20:2_22:6-PE                  | 0.9 ± 0.3b         | 2.3 ± 1.0a        | 0.6 ± 0.2b    | 1.1 ± 0.5b       |
| 834.5                       | 44:12                       | 22:6_22:6-PE                  | 15.7 ± 2.7a        | 11.7 ± 5.0b       | 6.6 ± 1.8c    | 6.0 ± 1.5c       |

|                            |       |              |                    |                   |               |                  |
|----------------------------|-------|--------------|--------------------|-------------------|---------------|------------------|
| 836.5                      | 44:11 | 22:5_22:6-PE | 5.1 ± 1.5b         | 5.7 ± 2.9ab       | 7.6 ± 1.6a    | 4.1 ± 1.4b       |
| 838.5                      | 44:10 | 22:4_22:6-PE | 0.8 ± 0.6b         | 1.6 ± 0.8a        | 1.2 ± 0.4ab   | 1.0 ± 0.3ab      |
|                            |       |              |                    |                   |               |                  |
| <b>[M - H]<sup>-</sup></b> |       | <b>PS</b>    | <b>High MO (%)</b> | <b>Low MO (%)</b> | <b>FO (%)</b> | <b>FO/VO (%)</b> |
| 806.5                      | 38:6  | 16:0_22:6-PS | 19.5 ± 7.8a        | 15.8 ± 7.3a       | 21.8 ± 9.1a   | 16.9 ± 10.0a     |
| 808.5                      | 38:5  | 18:0_20:5-PS | 10.9 ± 4.8a        | 5.4 ± 2.5b        | 12.2 ± 6.5a   | 8.2 ± 2.5ab      |
| 832.5                      | 40:7  | 18:1_22:6-PS | 11.0 ± 6.9ab       | 14.5 ± 8.2a       | 5.9 ± 3.2b    | 8.2 ± 4.0ab      |
| 834.5                      | 40:6  | 18:0_22:6-PS | 29.7 ± 6.5a        | 36.5 ± 11.5a      | 33.7 ± 8.1a   | 32.1 ± 9.2a      |
| 836.5                      | 40:5  | 18:0_22:5-PS | 8.1 ± 3.0a         | 11.5 ± 5.0a       | 12.5 ± 5.5a   | 13.6 ± 8.4a      |
| 854.5                      | 42:10 | 20:5_22:5-PS | 2.6 ± 1.5b         | 2.8 ± 1.5b        | 3.2 ± 1.5b    | 5.2 ± 2.5a       |
| 858.5                      | 42:8  | 20:3_22:5-PS | 2.3 ± 1.2b         | 2.8 ± 2.3ab       | 2.8 ± 2.4ab   | 5.4 ± 4.9a       |
| 878.5                      | 44:12 | 22:6_22:6-PS | 7.3 ± 1.9a         | 5.7 ± 3.9ab       | 3.0 ± 1.4c    | 4.5 ± 2.2bc      |
| 880.5                      | 44:11 | 22:5_22:6-PS | 8.7 ± 3.9a         | 5.1 ± 2.9b        | 5.0 ± 2.1b    | 6.0 ± 4.1ab      |
|                            |       |              |                    |                   |               |                  |
| <b>[M - H]<sup>-</sup></b> |       | <b>PI</b>    | <b>High MO (%)</b> | <b>Low MO (%)</b> | <b>FO (%)</b> | <b>FO/VO (%)</b> |
| 883.5                      | 38:5  | 16:0_22:5-PI | 15.5 ± 7.8b        | 19.9 ± 9.8b       | 50.2 ± 14.6a  | 41.0 ± 12.8a     |
| 909.5                      | 40:6  | 18:0_22:6-PI | 84.5 ± 7.8a        | 80.1 ± 9.8a       | 49.8 ± 14.6b  | 59.0 ± 12.8b     |

---

Values in each row having the same letter are not significantly different ( $p > 0.05$ ).

**Figure S1: Loading plots of PCA analysis from mass spectrometry analysis of PC and PE (PS and PI were not included due to their limited number).**

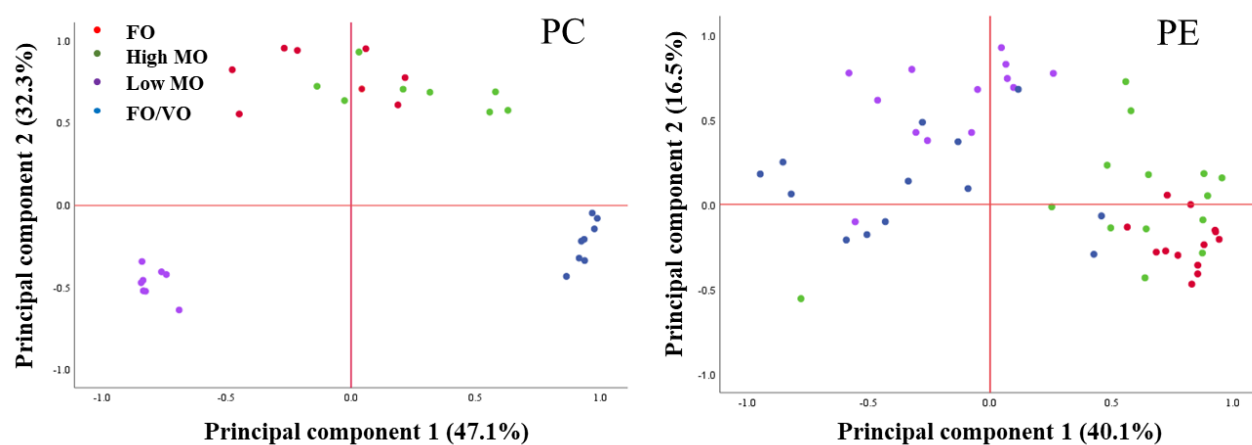

**Table S2: Quantitative analysis of total PL contents in salmon tissue upon feeding different diets (mg/g)**

|                    | <b>High MO</b> | <b>Low MO</b> | <b>FO</b>    | <b>FO/VO</b> |
|--------------------|----------------|---------------|--------------|--------------|
| <i>PL subclass</i> |                |               |              |              |
| <b>PC</b>          | 0.62 ± 0.10c   | 0.60 ± 0.05c  | 1.01 ± 0.09a | 0.80 ± 0.05b |
| <b>PE</b>          | 1.40 ± 0.39c   | 1.77 ± 0.45c  | 5.06 ± 1.31b | 6.37 ± 0.64a |
| <b>PS</b>          | 0.37 ± 0.09b   | 0.41 ± 0.12ab | 0.52 ± 0.13a | 0.33 ± 0.06b |
| <b>PI</b>          | 0.10 ± 0.05ab  | 0.08 ± 0.02b  | 0.13 ± 0.04a | 0.06 ± 0.02b |
| <b>Total</b>       | 2.49           | 2.86          | 6.72         | 7.56         |

**Values in each row having the same letter are not significantly different ( $p > 0.05$ ).**

**Table S3: Alterations in the level of triacylglycerol species in salmon muscle tissue upon feeding four different diets**

| $m/z$<br>[M + NH <sub>4</sub> ] <sup>+</sup> | C: double<br>bond ratio | Acyl<br>combination                                                                                           | High MO<br>(%) | Low MO<br>(%) | FO<br>(%)     | FO/VO<br>(%)  |
|----------------------------------------------|-------------------------|---------------------------------------------------------------------------------------------------------------|----------------|---------------|---------------|---------------|
| 848.8                                        | C50:2                   | 16:0_16:0_18:2                                                                                                | 0.03 ± 0.01a   | 0.05 ± 0.03a  | 0.03 ± 0.01a  | 0.03 ± 0.01a  |
| 852.8                                        | C50:0                   | 16:0_16:0_18:0                                                                                                | 0.14 ± 0.14b   | 0.23 ± 0.18ab | 0.44 ± 0.29a  | 0.39 ± 0.16a  |
| 868.7                                        | C52:6                   | 16:0_18:3_18:3                                                                                                | 0.02 ± 0.02c   | 0.04 ± 0.03bc | 0.24 ± 0.11a  | 0.11 ± 0.09b  |
| 870.9                                        | C52:5                   | 16:0_16:0_20:5/<br>16:0_18:2_18:3                                                                             | 0.32 ± 0.11c   | 0.38 ± 0.05c  | 2.12 ± 0.15a  | 1.97 ± 0.23b  |
| 872.8                                        | C52:4                   | 16:0_18:2_18:2                                                                                                | 0.22 ± 0.05a   | 0.22 ± 0.10a  | 0.21 ± 0.09ab | 0.15 ± 0.07b  |
| 874.8                                        | C52:3                   | 16:0_18:0_18:3/<br>16:0_18:1_18:2                                                                             | 1.15 ± 0.31a   | 0.85 ± 0.23b  | 0.47 ± 0.15c  | 1.20 ± 0.33a  |
| 876.8                                        | C52:2                   | 16:0_18:0_18:2/<br>16:0_18:1_18:1                                                                             | 0.07 ± 0.04a   | 0.08 ± 0.04a  | 0.08 ± 0.02a  | 0.05 ± 0.01a  |
| 878.9                                        | C52:1                   | 16:0_16:0_20:1                                                                                                | 15.02 ± 3.17a  | 7.99 ± 6.15b  | 2.81 ± 1.46c  | 1.92 ± 0.86c  |
| 880.8                                        | C52:0                   | 16:0_18:0_18:0                                                                                                | 0.05 ± 0.07a   | 0.05 ± 0.05a  | 0.06 ± 0.07a  | 0.06 ± 0.03a  |
| 892.9                                        | C54:8                   | 16:0_18:3_20:5/<br>18:2_18:3_18:3                                                                             | 1.08 ± 0.23b   | 0.96 ± 0.37b  | 1.01 ± 0.29b  | 1.42 ± 0.16a  |
| 894.9                                        | C54:7                   | 16:0_18:2_20:5/<br>16:0_18:3_20:4/<br>18:1_18:3_18:3/<br>18:2_18:2_18:3                                       | 0.66 ± 0.20b   | 0.77 ± 0.26b  | 0.68 ± 0.12b  | 1.13 ± 0.23a  |
| 896.9                                        | C54:6                   | 16:0_16:0_22:6/<br>16:0_18:1_20:5/<br>16:0_18:2_20:4/<br>16:0_18:3_20:3/<br>18:0_18:3_18:3/<br>18:1_18:2_18:3 | 7.10 ± 1.56c   | 8.92 ± 3.29c  | 19.38 ± 0.98a | 16.58 ± 1.89b |
| 898.9                                        | C54:5                   | 16:0_16:0_22:5/<br>16:0_18:0_20:5/<br>16:0_18:1_20:4/                                                         | 5.39 ± 0.65d   | 7.14 ± 1.08b  | 6.95 ± 0.48c  | 8.85 ± 0.73a  |
| 900.9                                        | C54:4                   | 16:0_18:3_20:1/<br>18:0_18:1_18:3/<br>18:0_18:2_18:2/                                                         | 2.45 ± 0.34c   | 4.85 ± 0.57a  | 0.52 ± 0.07d  | 3.24 ± 0.55b  |
| 902.9                                        | C54:3                   | 16:0_18:3_20:0/<br>18:0_18:0_18:3/<br>18:0_18:1_18:2                                                          | 1.23 ± 0.22b   | 1.02 ± 0.34b  | 2.43 ± 0.74a  | 2.91 ± 0.69a  |
| 904.9                                        | C54:2                   | 16:0_18:0_20:2/<br>18:0_18:0_18:2/<br>18:0_18:1_18:1                                                          | 0.42 ± 0.27a   | 0.34 ± 0.33a  | 0.37 ± 0.17a  | 0.24 ± 0.15a  |
| 906.9                                        | C54:1                   | 18:0_18:0_18:1                                                                                                | 0.19 ± 0.14ab  | 0.38 ± 0.43a  | 0.10 ± 0.04b  | 0.22 ± 0.12ab |

|       |       |                                                                                                               |               |               |               |               |
|-------|-------|---------------------------------------------------------------------------------------------------------------|---------------|---------------|---------------|---------------|
| 918.8 | C54:7 | 18:2_18:2_20:5/<br>18:2_18:3_20:4                                                                             | 1.36 ± 0.39a  | 1.75 ± 0.63a  | 1.00 ± 0.16b  | 1.57 ± 0.31a  |
| 920.9 | C56:8 | 18:1_18:2_20:5/<br>18:1_18:3_20:4/<br>18:2_18:2_20:4/<br>18:2_18:3_20:3                                       | 0.52 ± 0.23c  | 0.61 ± 0.18c  | 0.93 ± 0.18b  | 1.10 ± 0.16a  |
| 922.9 | C56:7 | 18:1_18:1_20:5/<br>18:1_18:2_20:4/<br>18:3_18:3_20:1                                                          | 1.23 ± 0.25c  | 0.61 ± 0.25d  | 2.58 ± 0.24a  | 1.93 ± 0.20b  |
| 924.8 | C56:6 | 16:0_18:2_22:4/<br>18:0_18:1_20:5/<br>18:0_18:2_20:4/<br>18:1_18:1_20:4/<br>18:2_18:3_20:1                    | 6.12 ± 0.76a  | 4.48 ± 1.03b  | 6.40 ± 0.64a  | 5.14 ± 0.26b  |
| 926.8 | C56:5 | 18:0_18:0_20:5/<br>18:0_18:1_20:4/<br>18:1_18:3_20:1/<br>18:2_18:2_20:1/<br>18:2_18:3_20:0                    | 2.04 ± 0.41d  | 3.08 ± 0.52b  | 2.96 ± 0.50c  | 3.55 ± 0.23a  |
| 928.9 | C56:4 | 18:0_18:0_20:4/<br>18:0_18:1_20:3/<br>18:0_18:3_20:1/<br>18:1_18:2_20:1/<br>18:1_18:3_20:0/<br>18:2_18:2_20:0 | 1.11 ± 0.15c  | 1.57 ± 0.40b  | 4.04 ± 0.11a  | 1.31 ± 0.16b  |
| 930.9 | C56:3 | 18:0_18:1_20:2/<br>18:0_18:3_20:0/<br>18:1_18:2_20:0                                                          | 0.05 ± 0.00c  | 0.04 ± 0.00c  | 0.31 ± 0.13b  | 0.58 ± 0.33a  |
| 946.8 | C56:9 | 18:1_18:2_22:6/<br>18:2_18:2_22:5/<br>18:2_18:3_22:4                                                          | 7.14 ± 2.18b  | 11.18 ± 1.46a | 6.63 ± 1.29b  | 8.34 ± 1.98b  |
| 948.9 | C56:8 | 18:1_18:2_22:5/<br>18:1_18:3_22:4/<br>18:2_18:2_22:4/<br>18:1_20:2_20:5/<br>18:2_20:3_20:3                    | 6.03 ± 0.50a  | 5.93 ± 0.62a  | 2.80 ± 0.18c  | 3.03 ± 0.59b  |
| 950.8 | C58:7 | 18:0_18:1_22:6/<br>18:0_18:2_22:5/<br>18:1_18:1_22:5/<br>18:0_20:2_20:5/<br>18:1_18:2_22:4                    | 38.73 ± 4.63a | 36.00 ± 5.91a | 37.31 ± 1.41a | 32.18 ± 1.51b |
| 952.9 | C58:6 | 18:1_18:1_22:4/<br>18:1_20:1_20:4                                                                             | 1.08 ± 0.19a  | 0.74 ± 0.17b  | 0.64 ± 0.18b  | 0.66 ± 0.18b  |

---

Values in each row having the same letter are not significantly different ( $p > 0.05$ ).

**Table S4: Fatty acid composition (mg/g) of four different diets (This information is obtained from Wei et al. 2021)**

| <b>Fatty acid</b> | <b>High MO</b>  | <b>Low MO</b>  | <b>FO</b>     | <b>FO/VO</b>  |
|-------------------|-----------------|----------------|---------------|---------------|
| 14:0              | 8.61 ± 1.44a    | 5.57 ± 1.52b   | 10.87 ± 0.89a | 7.51 ± 0.51ab |
| 15:0              | 1.19 ± 0.24a    | 0.75 ± 0.20b   | 0.84 ± 0.10ab | 0.59 ± 0.02b  |
| 16:0              | 29.44 ± 6.01b   | 24.40 ± 6.44c  | 32.15 ± 2.96a | 28.57 ± 1.79b |
| 17:0              | 0.34 ± 0.08c    | 0.24 ± 0.07c   | 0.81 ± 0.08a  | 0.58 ± 0.06b  |
| 18:0              | 3.97 ± 0.85b    | 4.86 ± 1.26b   | 7.18 ± 0.62a  | 7.43 ± 0.34a  |
| 16:1n-7           | 5.48 ± 1.00c    | 4.30 ± 1.18c   | 12.21 ± 1.10a | 9.18 ± 0.54b  |
| 16:1n-9           | 0.13 ± 0.05b    | 0.18 ± 0.04b   | 0.49 ± 0.07a  | 0.49 ± 0.08a  |
| 18:1n-9           | 57.74 ± 13.29ab | 87.60 ± 23.50a | 22.93 ± 1.97b | 74.86 ± 4.47a |
| 16:3n-4           | 0.13 ± 0.08c    | 0.08 ± 0.07c   | 2.08 ± 0.22a  | 1.37 ± 0.09b  |
| 18:2n-6           | 27.82 ± 6.79ab  | 37.54 ± 9.91a  | 14.40 ± 1.35b | 33.62 ± 2.04a |
| 18:3n-6           | 0.15 ± 0.05b    | 0.10 ± 0.06b   | 0.42 ± 0.09a  | 0.27 ± 0.09ab |
| 20:4n-6           | 0.44 ± 0.13b    | 0.43 ± 0.12b   | 1.85 ± 0.31a  | 1.41 ± 0.12a  |
| 18:3n-3           | 6.99 ± 1.75a    | 10.53 ± 2.80a  | 2.13 ± 0.43b  | 8.79 ± 0.55a  |
| 18:4n-3           | 0.30 ± 0.06c    | 0.25 ± 0.09c   | 3.53 ± 0.42a  | 2.44 ± 0.15b  |
| 20:4n-3           | 0.36 ± 0.08bc   | 0.19 ± 0.10c   | 1.02 ± 0.21a  | 0.76 ± 0.26ab |
| 20:5n-3           | 1.59 ± 0.30c    | 1.44 ± 0.54c   | 22.96 ± 2.26a | 15.44 ± 1.00b |
| 21:5n-3           | 0.00 ± 0.01c    | 0.01 ± 0.01c   | 0.97 ± 0.05a  | 0.66 ± 0.02b  |
| 22:5n-6           | 5.29 ± 1.26a    | 3.04 ± 0.78b   | 0.47 ± 0.11c  | 0.38 ± 0.11c  |
| 22:6n-3           | 29.41 ± 7.35a   | 17.28 ± 4.78b  | 14.34 ± 1.44b | 9.83 ± 0.45b  |

**Values in each row having the same letter are not significantly different ( $p > 0.05$ ).**
